# Supplementary material for: Platelets as Potential Non-Traditional Cardiovascular Risk Factor—Analysis Performed in Healthy Donors
Source: MDPI journal article supplement (doi:10.3390/ijms241914914), 2023-10-05
Supplement: s1 [file s1]

# Platelets as Potential Non-Traditional Cardiovascular Risk Factor – Analysis Performed in Healthy Donors

Patrycja Szymańska <sup>1\*</sup>, Bogusława Luzak <sup>1</sup>, Przemysław Siarkiewicz <sup>2</sup> and Jacek Golański <sup>1</sup>

**Table S1.** The basic characteristics of study group ( $n = 94$ ) including other blood morphology, and biochemical parameters, inflammatory markers, and platelet functions indices.

| Variable                                                                       | All Donors ( $n = 94$ ) |
|--------------------------------------------------------------------------------|-------------------------|
| PCT (%)                                                                        | 0.25 (0.23-0.29)        |
| PDW (fL)                                                                       | 11.7 (10.9-13.3)        |
| PMI (fL/mL)                                                                    | 2.5 (2.3-2.9)           |
| WBC ( $\times 10^3/\mu\text{L}$ )                                              | $6.10 \pm 1.40$         |
| NEU ( $\times 10^3/\mu\text{L}$ )                                              | 3.10 (2.54-3.87)        |
| LYM ( $\times 10^3/\mu\text{L}$ )                                              | 2.02 (1.70-2.40)        |
| MON ( $\times 10^3/\mu\text{L}$ )                                              | 0.53 (0.46-0.62)        |
| EOS ( $\times 10^3/\mu\text{L}$ )                                              | 0.16 (0.10-0.22)        |
| BAS ( $\times 10^3/\mu\text{L}$ )                                              | 0.04 (0.03-0.05)        |
| RBC ( $\times 10^6/\mu\text{L}$ )                                              | $4.78 \pm 0.48$         |
| HGB (g/dL)                                                                     | 14.4 (13.1-15.5)        |
| HCT (%)                                                                        | $41.7 \pm 4.0$          |
| MCV (fL)                                                                       | 87 (85-90)              |
| MCH (pg)                                                                       | 30.1 (28.9-30.8)        |
| MCHC (g/dL)                                                                    | $34.2 \pm 0.9$          |
| RDW (%)                                                                        | 12.7 (12.3-13.1)        |
| Creatinine ( $\mu\text{mol/L}$ )                                               | 78.7 (66.8-89.6)        |
| GFR (mL/min/1.73m <sup>2</sup> )                                               | $97.1 \pm 17.8$         |
| Uric acid ( $\mu\text{mol/L}$ )                                                | $319.6 \pm 86.7$        |
| Bilirubin ( $\mu\text{mol/L}$ )                                                | 12.5 (9.2-15.7)         |
| AST (U/L)                                                                      | 23.1 (19.6-26.7)        |
| ALT (U/L)                                                                      | 19.1 (14.5-33.1)        |
| AIISI                                                                          | 190.9 (141.4-275.5)     |
| IL-6 (pg/mL)                                                                   | 3.3 (2.6-4.5)           |
| CD40 (pg/mL)                                                                   | 44.6 (33.2-91.2)        |
| CD62-positive PLT at rest – no agonist (%)                                     | 1.8 (1.3-2.3)           |
| CD62-positive PLT after 1 h at 37 °C – no agonist (%)                          | 64.7 (29.8-78.2)        |
| CD62-positive platelets at rest (collagen 10 $\mu\text{g/mL}$ ) (%)            | 2.1 (1.5-3.4)           |
| CD62-positive platelets after 1 h at 37 °C (collagen 10 $\mu\text{g/mL}$ ) (%) | 67.4 (18.5-80.0)        |
| Fibrinogen-positive PLT at rest – no agonist (%)                               | 3.0 (2.4-4.9)           |
| Fibrinogen-positive PLT after 1 h at 37 °C – no agonist (%)                    | 62.5 (43.4-70.8)        |
| Fibrinogen-positive PLT at rest (collagen 10 $\mu\text{g/mL}$ ) (%)            | 2.3 (1.7-5.0)           |
| Fibrinogen-positive PLT after 1 h at 37 °C (collagen 10 $\mu\text{g/mL}$ ) (%) | $45.3 \pm 21.0$         |
| Collagen-induced aggregation – at rest, AUC (%*min)                            | 708.8 (659.8-747.0)     |

|                                                                |                     |
|----------------------------------------------------------------|---------------------|
| Collagen-induced aggregation – after 1 h at 37 °C, AUC (%*min) | 643.8 (538.1-681.6) |
| Platelet ROS generation, 5 min (thrombin 0.1 U/mL) (%)         | 9.5 (7.7-12.2)      |
| Platelet ROS generation, 10 min (thrombin 0.1 U/mL) (%)        | 14.2 ± 4.5          |

Variables were presented as raw values as mean ± SD (normal distribution) or median (IQR) (non-normal distribution). Student's t-test (normal distribution) or Mann-Whitney U test (non-normal distribution) were used to assess the significance of differences between two groups (females vs. males). PCT – platelet crit; PDW – platelet distribution width; PMI – platelet mass index; WBC – white blood cells; NEU – neutrophils; LYM – lymphocytes; MON – monocytes; EOS – eosinophils; BAS – basophils; RBC – red blood cells; HGB – hemoglobin; HCT – hematocrit; MCV – mean corpuscular volume; MCH – mean corpuscular hemoglobin; MCHC – mean corpuscular hemoglobin concentration; RDW – red cell distribution width; GFR – glomerular filtration rate; AST – aspartate aminotransferase; ALT – alanine aminotransferase; AISI – aggregate index of systemic inflammation (neutrophil × monocyte × platelet/lymphocyte); IL-6 – interleukin-6; CD40 – cluster of differentiation 40; CD62 – P-selectin; PLT – platelets; AUC – area under the curve; ROS – reactive oxygen species.

**Table S2.** Characteristics of platelet parameters, platelet-based inflammatory markers, IL-6 and CD40 ligand in relation to cardiometabolic risk factors.

| Parameter                              | MPV (fL)         | PCT (%)          | PDW (fL)         | PMI (fL/mL)   | PLR                 | SII                 | AISI                | MPVLR         | IL-6 (pg/mL)  | CD40 (pg/mL)      |
|----------------------------------------|------------------|------------------|------------------|---------------|---------------------|---------------------|---------------------|---------------|---------------|-------------------|
| TC (cut-off: 5.23 mmol/L)              |                  |                  |                  |               |                     |                     |                     |               |               |                   |
| lower TC                               | 10.4 (9.9-11.2)  | 0.25 (0.23-0.28) | 11.9 (11.0-13.8) | 2.5 (2.3-2.8) | 128.1 (106.4-149.0) | 362.6 (292.0-511.0) | 184.6 (141.4-264.3) | 5.3 (4.8-7.2) | 3.4 (2.7-4.5) | 36.5 (31.1-63.5)  |
| higher TC                              | 10.3 (9.8-10.8)  | 0.25 (0.22-0.29) | 11.6 (10.7-13.3) | 2.5 (2.2-2.9) | 116.6 (97.4-153.0)  | 399.5 (270.2-494.3) | 203.1 (138.5-276.3) | 4.8 (3.9-5.5) | 3.2 (2.6-4.6) | 50.0 (39.2-137.2) |
| <i>p</i> Value                         | 0.209            | 0.982            | 0.307            | 0.979         | 0.104               | 0.946               | 0.506               | 0.002         | 0.832         | 0.123             |
| LDL-C (cut-off: 3.13 mmol/L)           |                  |                  |                  |               |                     |                     |                     |               |               |                   |
| lower LDL-C                            | 10.4 (9.9-11.3)  | 0.25 (0.22-0.27) | 12.0 (11.0-14.2) | 2.5 (2.2-2.7) | 123.2 (101.2-148.7) | 355.8 (253.0-481.6) | 179.9 (132.8-264.3) | 5.5 (4.6-7.1) | 3.4 (2.7-4.5) | 36.2 (31.1-54.0)  |
| higher LDL-C                           | 10.3 (9.9-10.8)  | 0.26 (0.24-0.31) | 11.7 (10.7-13.1) | 2.6 (2.4-3.0) | 118.3 (101.9-153.0) | 400.2 (293.1-496.0) | 226.5 (151.9-279.0) | 4.8 (4.0-5.4) | 3.2 (2.6-4.6) | 58.6 (43.5-137.2) |
| <i>p</i> Value                         | 0.192            | 0.117            | 0.157            | 0.109         | 0.832               | 0.216               | 0.141               | 0.006         | 0.859         | 0.035             |
| non-HDL-C (cut-off: 3.74 mmol/L)       |                  |                  |                  |               |                     |                     |                     |               |               |                   |
| lower non-HDL                          | 10.4 (9.9-11.3)  | 0.26 (0.23-0.28) | 11.9 (11.0-14.3) | 2.6 (2.4-2.8) | 126.9 (106.6-148.3) | 371.6 (292.0-497.2) | 183.9 (133.9-265.6) | 5.3 (4.8-7.0) | 3.4 (2.6-4.5) | 38.1 (31.1-62.4)  |
| higher non-HDL                         | 10.3 (9.8-10.8)  | 0.25 (0.22-0.30) | 11.7 (10.7-13.1) | 2.5 (2.2-3.0) | 116.6 (97.4-155.0)  | 372.1 (270.2-496.0) | 214.5 (146.0-276.3) | 4.8 (4.0-5.5) | 3.2 (2.6-4.5) | 49.7 (39.2-137.2) |
| <i>p</i> Value                         | 0.252            | 0.821            | 0.237            | 0.806         | 0.223               | 0.922               | 0.315               | 0.006         | 0.885         | 0.138             |
| TG (cut-off: 1.12 mmol/dL)             |                  |                  |                  |               |                     |                     |                     |               |               |                   |
| lower TG                               | 10.3 (9.9-11.2)  | 0.25 (0.23-0.28) | 11.7 (11.0-13.2) | 2.5 (2.3-2.8) | 127.5 (104.5-148.3) | 358.7 (270.2-511.0) | 203.1 (137.8-276.4) | 5.4 (4.7-6.8) | 3.4 (2.2-4.6) | 47.0 (34.8-66.8)  |
| higher TG                              | 10.4 (9.9-11.0)  | 0.26 (0.22-0.29) | 12.0 (10.8-13.3) | 2.6 (2.2-2.9) | 116.6 (97.4-155.0)  | 391.4 (279.9-494.3) | 183.9 (141.5-272.7) | 4.9 (3.9-5.5) | 3.3 (2.6-4.5) | 41.9 (31.1-108.2) |
| <i>p</i> Value                         | 0.734            | 0.573            | 0.931            | 0.565         | 0.263               | 0.711               | 0.844               | 0.024         | 0.825         | 0.958             |
| Glucose (cut-off: 5.25 mmol/L)         |                  |                  |                  |               |                     |                     |                     |               |               |                   |
| lower glucose                          | 10.5 (10.0-11.2) | 0.25 (0.22-0.27) | 11.9 (11.0-14.0) | 2.5 (2.2-2.7) | 118.1 (101.4-140.9) | 354.2 (253.4-448.2) | 184.6 (133.9-264.2) | 5.2 (4.1-6.6) | 3.2 (2.2-4.3) | 44.6 (35.9-91.2)  |
| higher glucose                         | 10.3 (9.7-10.8)  | 0.26 (0.24-0.31) | 11.6 (10.7-13.0) | 2.6 (2.4-3.1) | 122.7 (102.6-166.3) | 418.3 (292.1-536.0) | 196.8 (155.3-321.3) | 5.1 (4.5-6.2) | 3.4 (2.7-4.6) | 55.9 (22.4-108.2) |
| <i>p</i> Value                         | 0.149            | 0.095            | 0.250            | 0.137         | 0.286               | 0.061               | 0.132               | 0.634         | 0.169         | 0.972             |
| BMI (cut-off: 24.3 kg/m <sup>2</sup> ) |                  |                  |                  |               |                     |                     |                     |               |               |                   |
| lower BMI                              | 10.5 (10.0-11.6) | 0.25 (0.23-0.27) | 12.0 (11.0-14.4) | 2.5 (2.3-2.7) | 118.3 (102.8-131.4) | 341.3 (253.0-435.6) | 168.2 (132.8-263.1) | 5.2 (4.6-6.8) | 2.9 (2.1-4.3) | 39.7 (31.1-63.5)  |
| higher BMI                             | 10.3 (10.0-10.9) | 0.26 (0.23-0.31) | 11.7 (11.0-13.2) | 2.6 (2.3-3.1) | 119.8 (104.5-155.0) | 401.0 (286.3-536.0) | 238.4 (137.7-276.3) | 5.1 (4.4-6.2) | 3.4 (2.9-4.6) | 53.0 (36.5-108.2) |
| <i>p</i> Value                         | 0.260            | 0.320            | 0.346            | 0.317         | 0.331               | 0.057               | 0.130               | 0.337         | 0.049         | 0.406             |

Results were presented as median (IQR) (non-normal distribution). Mann-Whitney U test (non-normal distribution) was used to assess the significance of differences between two groups (lower vs. higher TC; lower vs. higher LDL-C; lower vs. higher non-HDL-C; lower vs. higher TG; lower vs. higher glucose; lower vs. higher BMI). MPV – mean platelet volume; PCT – platelet crit; PDW – platelet distribution width; PMI – platelet mass index; PLR – platelet/lymphocyte ratio; SII – systemic immune-inflammation index (neutrophil × platelets/lymphocyte); AISI – aggregate index of systemic inflammation (neutrophil × monocyte × platelet/lymphocyte); MPVLR – MPV/lymphocyte ratio; IL-6 – interleukin-6; CD40 – cluster of differentiation 40; TC – total cholesterol; LDL-C – low-density lipoprotein cholesterol; non-HDL-C – non-high-density lipoprotein cholesterol; TG – triglyceride; BMI – body mass index.

**Table S3.** Characteristics of platelet reactivity and platelet ROS generation in relation to cardiometabolic risk factors.

| Parameter                        | Fibrinogen Binding<br>(at Rest) | Fibrinogen Binding<br>(after 1 h at 37 °C) | P-selectin Exposure<br>(at Rest) | P-selectin exposure<br>(after 1 h at 37 °C) | ROS Generation<br>(Thrombin, 5 min) | ROS Generation<br>(Thrombin, 10 min) |
|----------------------------------|---------------------------------|--------------------------------------------|----------------------------------|---------------------------------------------|-------------------------------------|--------------------------------------|
| TC (cut-off: 5.23 mmol/L)        |                                 |                                            |                                  |                                             |                                     |                                      |
| lower TC                         | 62.0 (41.3-69.1)                | 45.7 ± 19.1                                | 60.2 (22.0-74.8)                 | 60.2 (17.3-80.0)                            | 9.4 (7.7-11.5)                      | 13.6 ± 4.3                           |
| higher TC                        | 63.0 (47.5-70.9)                | 44.8 ± 23.1                                | 70.4 (36.3-85.2)                 | 69.8 (21.4-80.6)                            | 9.5 (8.0-12.6)                      | 14.7 ± 4.6                           |
| <i>p</i> Value                   | 0.531                           | 0.863                                      | 0.127                            | 0.544                                       | 0.532                               | 0.255                                |
| LDL-C (cut-off: 3.13 mmol/L)     |                                 |                                            |                                  |                                             |                                     |                                      |
| lower LDL-C                      | 54.9 ± 20.6                     | 45.2 ± 19.9                                | 59.9 (23.1-75.8)                 | 64.9 (17.3-80.0)                            | 9.5 (6.8-12.2)                      | 13.6 ± 4.9                           |
| higher LDL-C                     | 58.9 ± 18.1                     | 45.4 ± 22.6                                | 68.6 (45.8-83.3)                 | 72.1 (25.5-80.5)                            | 9.5 (8.1-12.3)                      | 14.8 ± 3.9                           |
| <i>p</i> Value                   | 0.408                           | 0.962                                      | 0.234                            | 0.559                                       | 0.619                               | 0.212                                |
| non-HDL-C (cut-off: 3.74 mmol/L) |                                 |                                            |                                  |                                             |                                     |                                      |
| lower non-HDL                    | 63.3 (45.8-71.2)                | 46.5 ± 18.9                                | 64.7 (23.1-75.8)                 | 69.3 (20.5-80.3)                            | 9.8 (7.8-12.2)                      | 14.3 ± 4.6                           |
| higher non-HDL                   | 60.4 (41.9-70.8)                | 43.9 ± 23.5                                | 64.5 (44.0-85.0)                 | 58.5 (14.8-80.0)                            | 9.4 (7.7-12.1)                      | 14.1 ± 4.4                           |
| <i>p</i> Value                   | 0.749                           | 0.629                                      | 0.424                            | 0.467                                       | 0.600                               | 0.870                                |
| TG (cut-off: 1.12 mmol/dL)       |                                 |                                            |                                  |                                             |                                     |                                      |
| lower TG                         | 62.9 (46.9-70.6)                | 46.1 (35.4-55.2)                           | 64.5 (29.8-78.1)                 | 69.3 (27.3-80.0)                            | 9.5 (7.8-11.5)                      | 14.1 ± 4.7                           |
| higher TG                        | 60.5 (41.6-72.0)                | 46.7 (17.7-62.1)                           | 69.9 (32.8-78.9)                 | 64.9 (14.7-80.4)                            | 9.5 (7.7-12.4)                      | 14.2 ± 4.4                           |
| <i>p</i> Value                   | 0.801                           | 0.691                                      | 0.791                            | 0.390                                       | 0.832                               | 0.932                                |
| Glucose (cut-off: 5.25 mmol/L)   |                                 |                                            |                                  |                                             |                                     |                                      |
| lower glucose                    | 63.6 (46.1-69.6)                | 52.3 (35.3-65.0)                           | 64.6 (29.8-78.2)                 | 67.9 (20.0-82.1)                            | 9.3 (6.9-12.6)                      | 14.1 ± 5.0                           |
| higher glucose                   | 60.3 (41.6-72.4)                | 41.5 (22.5-53.9)                           | 64.8 (30.6-78.1)                 | 67.1 (16.4-79.1)                            | 9.6 (8.2-11.5)                      | 14.2 ± 3.9                           |
| <i>p</i> Value                   | 0.971                           | 0.089                                      | 0.860                            | 0.520                                       | 0.544                               | 0.879                                |

| BMI (cut-off: 24.3 kg/m <sup>2</sup> ) |             |                  |                  |                  |                |            |
|----------------------------------------|-------------|------------------|------------------|------------------|----------------|------------|
| lower BMI                              | 60.0 ± 18.1 | 52.3 (41.2-59.8) | 69.0 (48.3-78.1) | 77.2 (44.4-83.8) | 9.4 (7.8-12.3) | 14.3 ± 4.5 |
| higher BMI                             | 56.3 ± 19.0 | 43.6 (17.9-62.7) | 60.2 (23.1-81.5) | 36.0 (16.1-75.6) | 9.6 (7.7-12.4) | 14.7 ± 4.8 |
| <i>p</i> Value                         | 0.464       | 0.304            | 0.411            | 0.014            | 0.921          | 0.721      |

Variables were presented as raw values as mean ± SD (normal distribution) or median (IQR) (non-normal distribution). Student's t-test (normal distribution) or Mann-Whitney U test (non-normal distribution) were used to assess the significance of differences between two groups (lower vs. higher TC; lower vs. higher LDL-C; lower vs. higher non-HDL-C; lower vs. higher TG; lower vs. higher glucose; lower vs. higher BMI). ROS – reactive oxygen species; TC – total cholesterol; LDL-C – low-density lipoprotein cholesterol; non-HDL-C – non-high-density lipoprotein cholesterol; TG – triglyceride; BMI – body mass index.
